# Supplementary material for: Low-voltage scanning electron microscopy study of lampbrush chromosomes and nuclear bodies in avian and amphibian oocytes
Source: PubMed Central journal article supplement (PMC5114574; doi:10.1038/srep36878), 2016-11-18
Supplement: srep36878-s1.pdf [file srep36878-s1.pdf]

## **Supplementary Information**

### **LOW-VOLTAGE SCANNING ELECTRON MICROSCOPY STUDY OF LAMPBRUSH CHROMOSOMES AND NUCLEAR BODIES IN AVIAN AND AMPHIBIAN OOCYTES**

Tatiana Kulikova<sup>1</sup>, Tatiana Khodyuchenko<sup>1</sup>, Yuri Petrov<sup>1</sup>, Alla Krasikova<sup>1\*</sup>

<sup>1</sup>*Saint-Petersburg State University, Saint-Petersburg, Russia*

\*Address for correspondence (Saint-Petersburg State University, 7-9, Universitetskaya nab., 199034, Saint-Petersburg, Russia Tel: 79213267671; E-mail: [alla.krasikova@gmail.com](mailto:alla.krasikova@gmail.com))

## **Supplementary Information Guide**

### **This file includes**

Supplementary Figures and Legends S1-S4

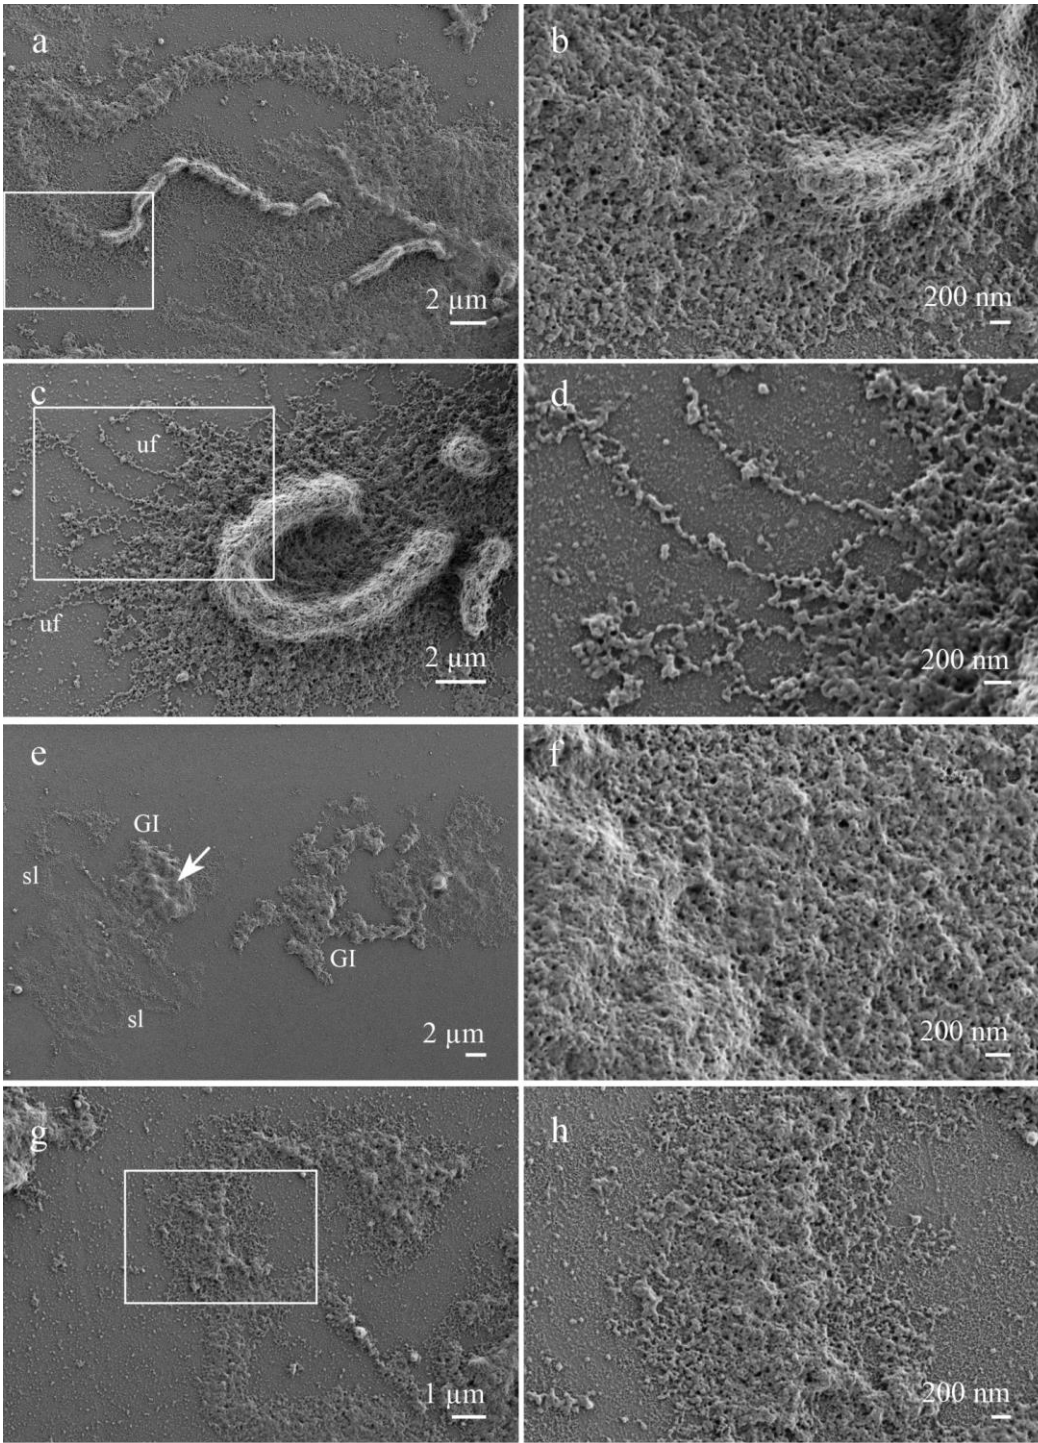

**Supplementary Figure 1. The surface morphology of complex lateral loops, simple lateral loops and GITERA.** Lampbrush chromosomes of *Columba livia*. **a, c** – pericentromere dense loops on chromosome W; **b, d** – enlarged fragments of **a, c**; uf – untwisted RNP-fibrils. **e** – fragment of lampbrush chromosomes bearing GITERA; sl – simple lateral loops, GI – GITERA, arrow – area enlarged on **f**. **f** – enlarged fragment of GITERA. **g, h** – enlarged fragments of simple lateral loops shown on panel **e**. Low-voltage scanning electron microscopy. Scale bars: **a, c, e** – 2  $\mu\text{m}$ , **b, d, f, h** – 200 nm, **g** – 1  $\mu\text{m}$ .

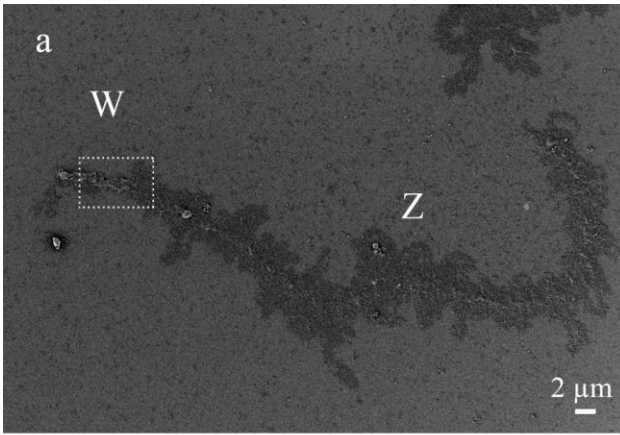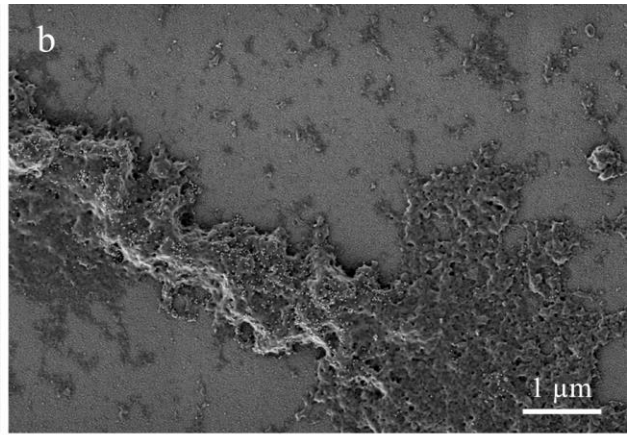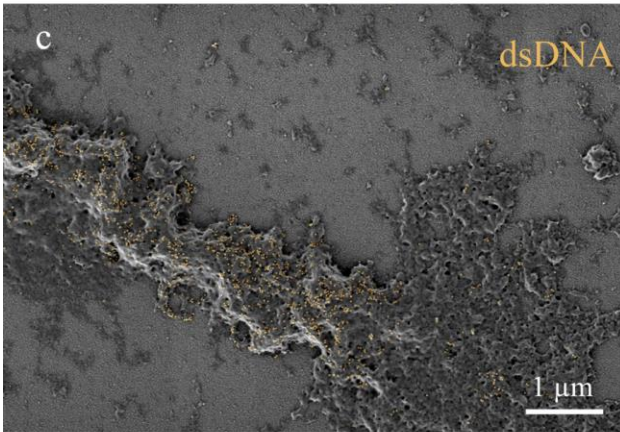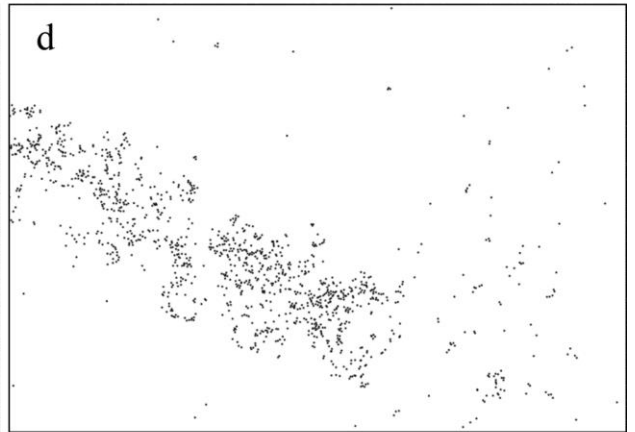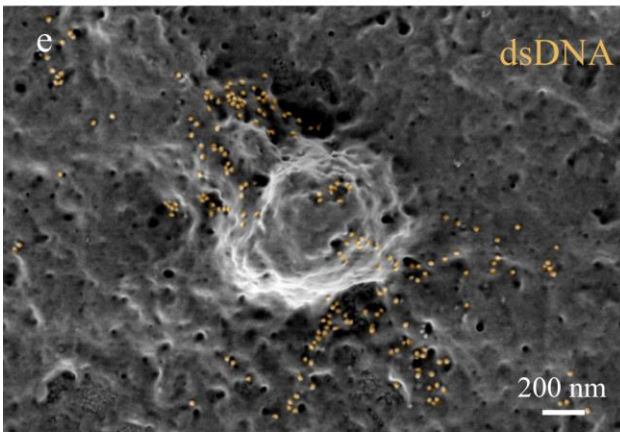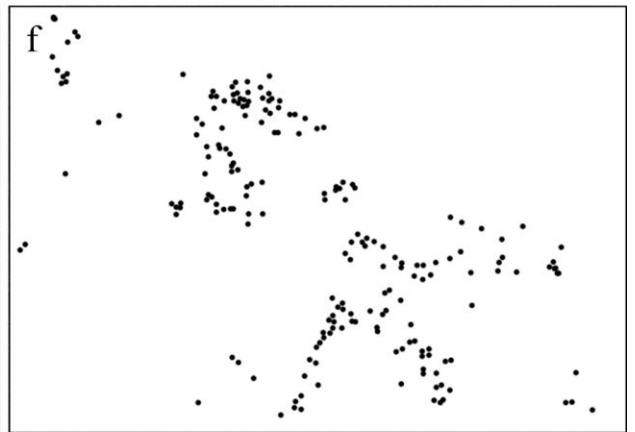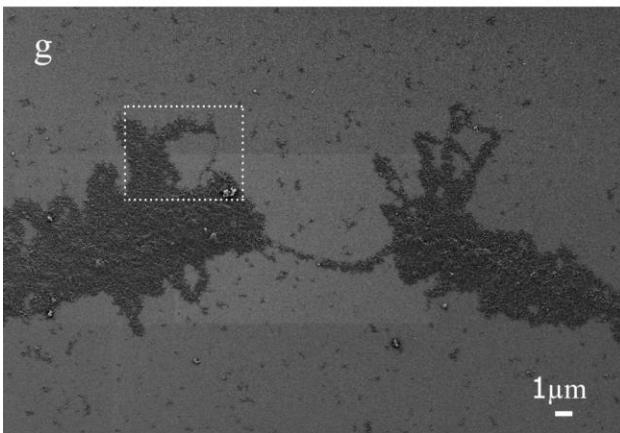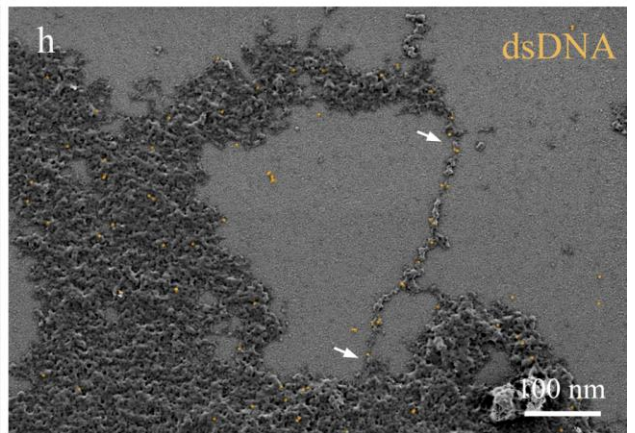

**Supplementary Figure 2. Surface distribution of dsDNA on chromomeres and untranscribed regions of lateral loop axes.** Lampbrush chromosomes of *Coturnix coturnix japonica*, immunogold labelling with antibodies against dsDNA. ZW-lampbrush bivalent (**a**) and enlarged fragment of W-lampbrush chromosome (**b, c, d**), a separate chromomere (**e**), fragment of a lampbrush chromosome (**g**), enlarged lateral loop; edges of untranscribed region marked with arrows (**h**). **b** – dsDNA revealed by 18 nm gold nanoparticles (electron dense granules); **c, e, h** – gold nanoparticles pseudocoloured with yellow; **d, f** – distribution pattern of gold nanoparticles. Low-voltage scanning electron microscopy. Scale bars: **a** – 2  $\mu\text{m}$ , **b** – 1  $\mu\text{m}$ , **c** – 1  $\mu\text{m}$  **e** – 200 nm, **g, h** – 1  $\mu\text{m}$ , **h**.

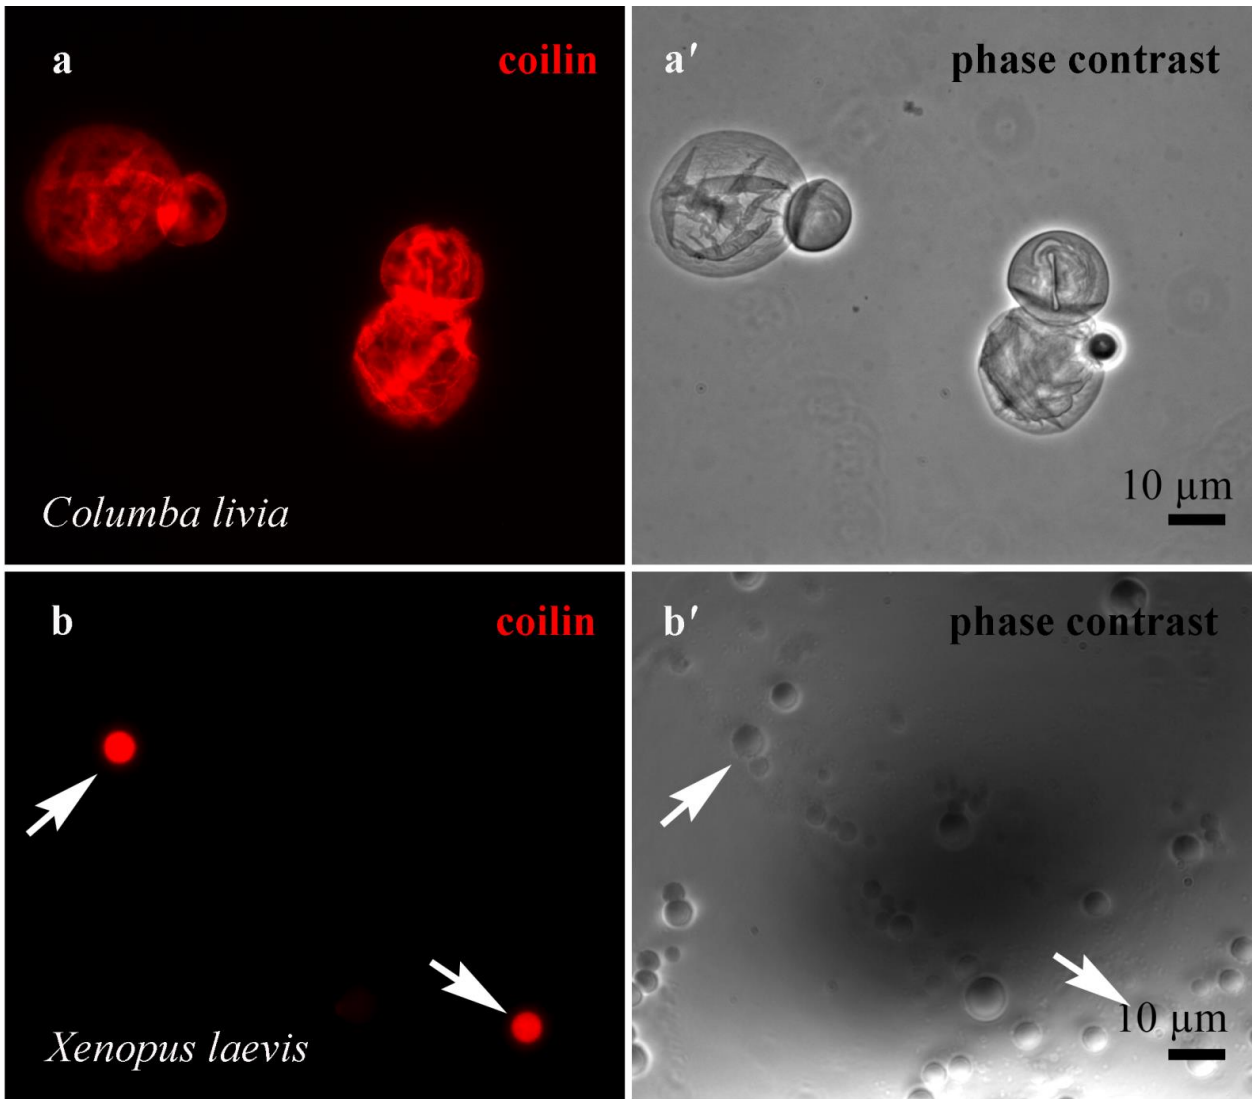

**Supplementary Figure 3. Coilin-containing nuclear bodies in *Columba livia* and *Xenopus laevis* growing oocyte nucleus.** Distribution of protein coilin in nuclear structures of pigeon (**a**) and frog (**b**) growing oocytes. Immunofluorescent labeling with antibodies against coilin (red). Corresponding phase contrast images in transmitted light are shown (**a'**, **b'**). Scale bars: 10  $\mu\text{m}$ .

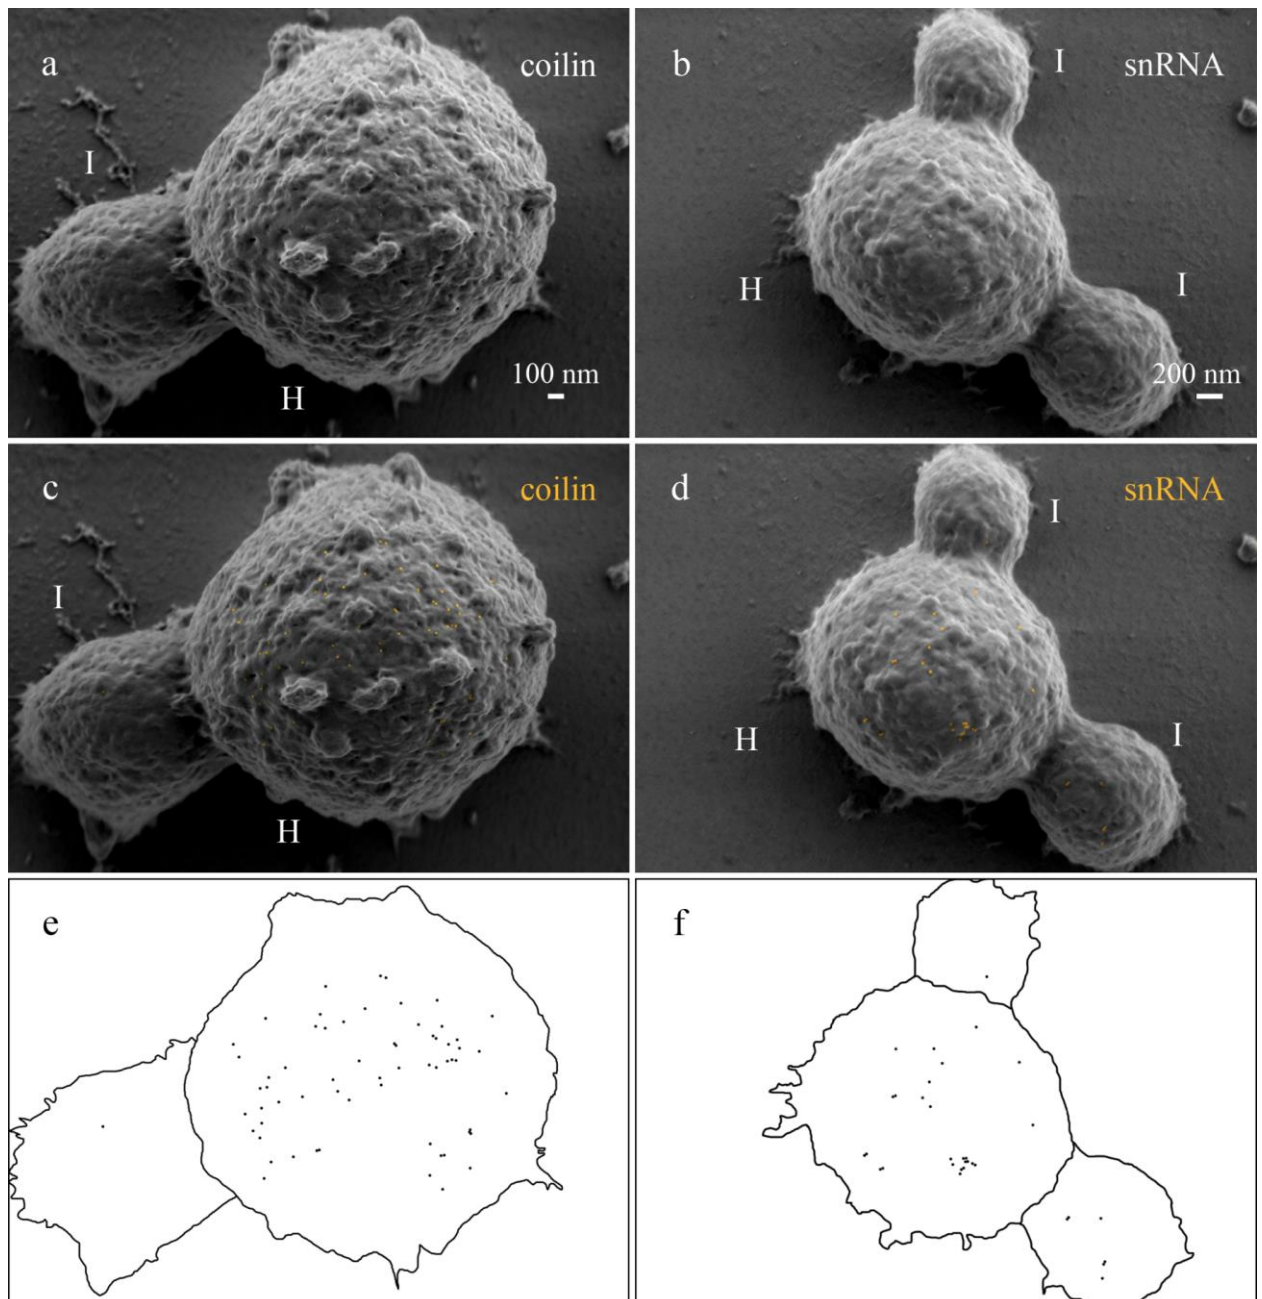

**Supplementary Figure 4. The distribution of coilin and snRNA on the surface of HLB and attached IGC of *Xenopus laevis* growing oocytes.** Immunogold labeling with antibodies against coilin (**a**, **c**, **e**) and snRNAs (**b**, **d**, **f**). **a**, **b** – distribution of coilin or snRNA on the surface of HLB (H) and IGC (I) revealed by 10 nm and 18 nm gold nanoparticles (electron dense granules) correspondingly; **c**, **d** – gold nanoparticles pseudocoloured with yellow; **e**, **f** – distribution patterns of gold nanoparticles. Low-voltage scanning electron microscopy. Scale bars: **a** – 100 nm, **b** – 200 nm.
